# Supplementary material for: Novel nano-dyad of homoleptic sandwich-type phthalocyanines with nitrogen doped graphene quantum dots for nonlinear optics
Source: Royal Society of Chemistry journal article supplement (doi:10.1039/c8nj01707g), 2018-01-01
Supplement: c8nj01707g1.pdf [file c8nj01707g1.pdf]

## Supplementary Information

### Novel nano-dyad of homoleptic sandwich-type phthalocyanines with nitrogen doped graphene quantum dots for nonlinear optics

David O. Oluwole\*, Nwaji Njemuwa, Lindokuhle C. Nene, Lesedi Mokone, Edith Dube and Tebello Nyokong\*

|                                                                                                                                                                                                                                                          |   |
|----------------------------------------------------------------------------------------------------------------------------------------------------------------------------------------------------------------------------------------------------------|---|
| Figure S1. Mass spectra for complexes <b>3</b> and <b>4</b>                                                                                                                                                                                              | 1 |
| Figure S2. (A) Ground state electronic absorption spectra for complexes <b>1</b> to <b>4</b> in DMSO and (B) Concentration dependent absorption spectra for complexes <b>2</b> to <b>4</b> used for the determination of the molar absorptivity in DMSO. | 2 |
| Figure S3. FT-IR spectra for the conjugates.                                                                                                                                                                                                             | 5 |
| Figure S4. UV-Vis spectrum of NGQDs and complex <b>2</b> as an example                                                                                                                                                                                   | 6 |
| Figure S5. Histogram of the size distribution for NGQDs                                                                                                                                                                                                  | 6 |
| Table S1: Optical limiting parameters for complexes and their conjugates                                                                                                                                                                                 | 6 |

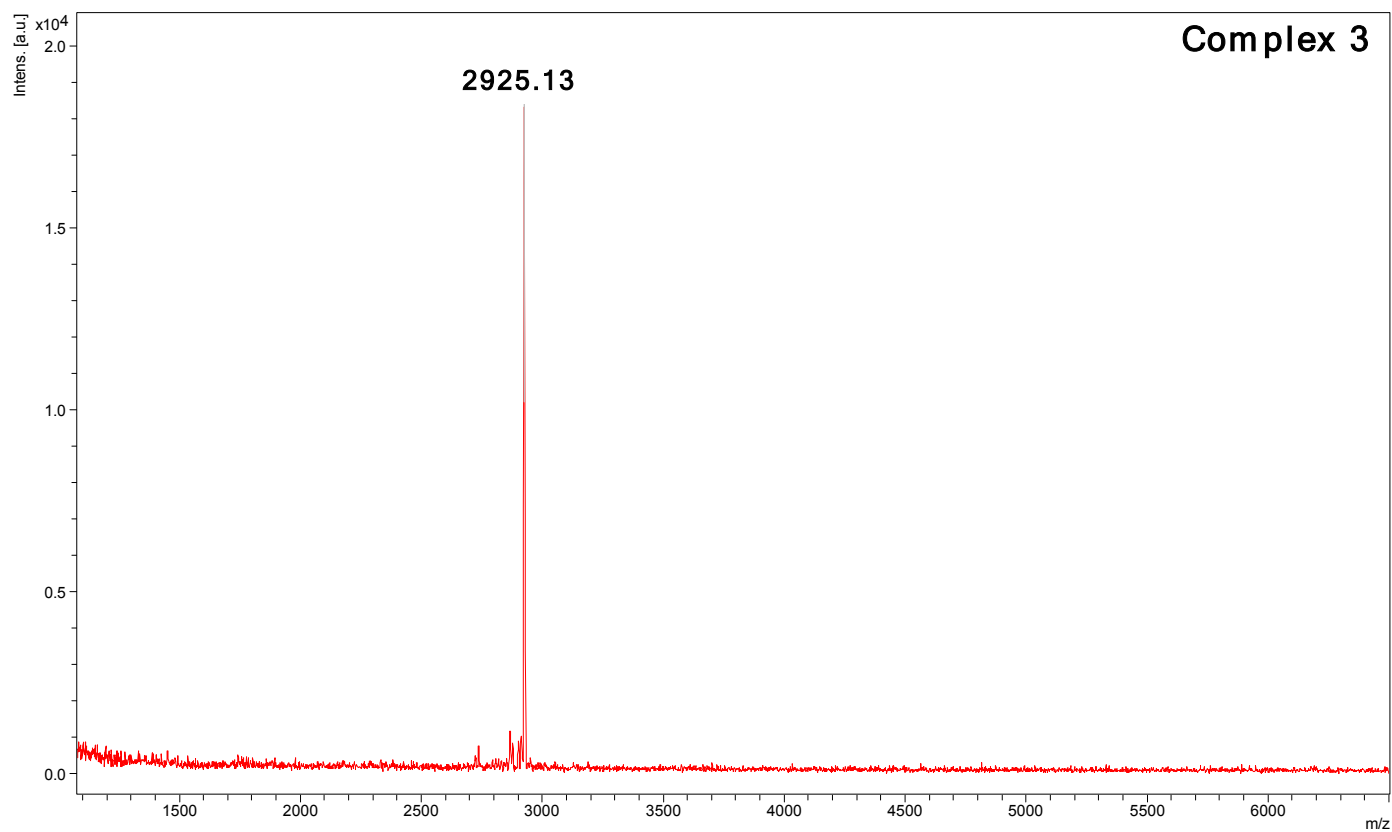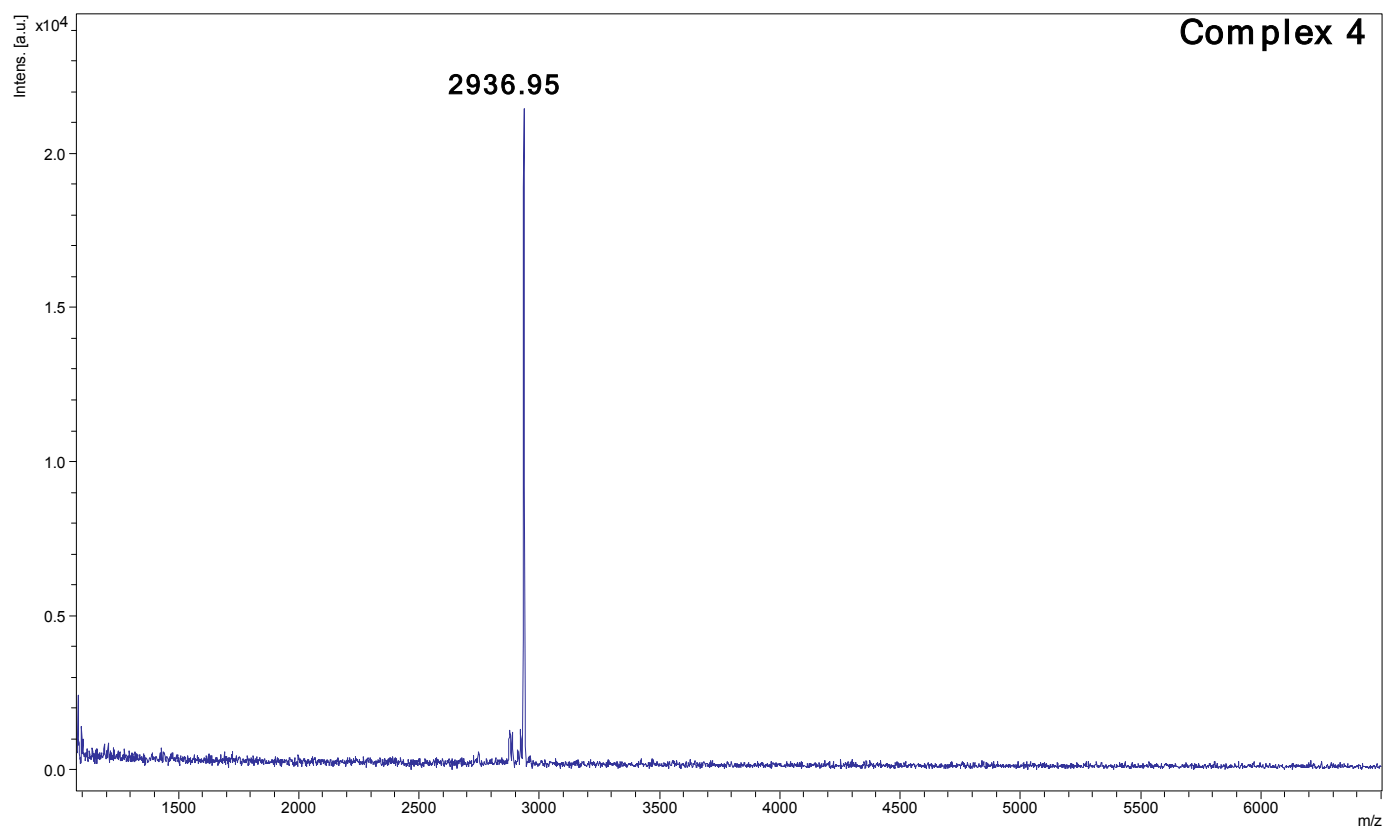

Figure S1. Mass spectra for complexes 3 and 4



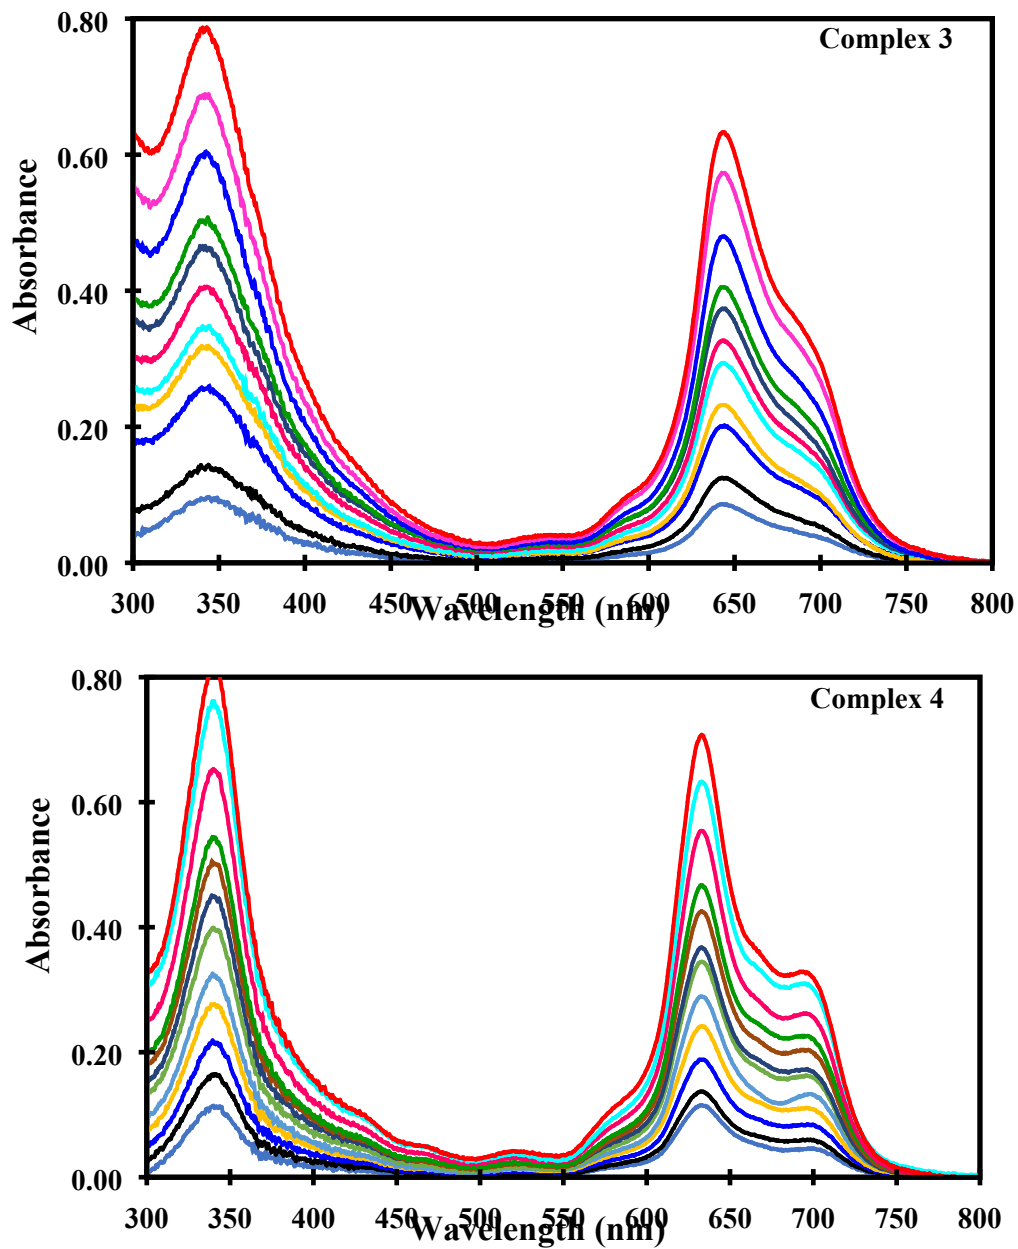

**Figure S2. (A) Ground state electronic absorption spectra for complexes 1 to 4 in DMSO and (B) Concentration dependent absorption spectra for complexes 2 to 4 used for the determination of the molar absorptivity in DMSO.**

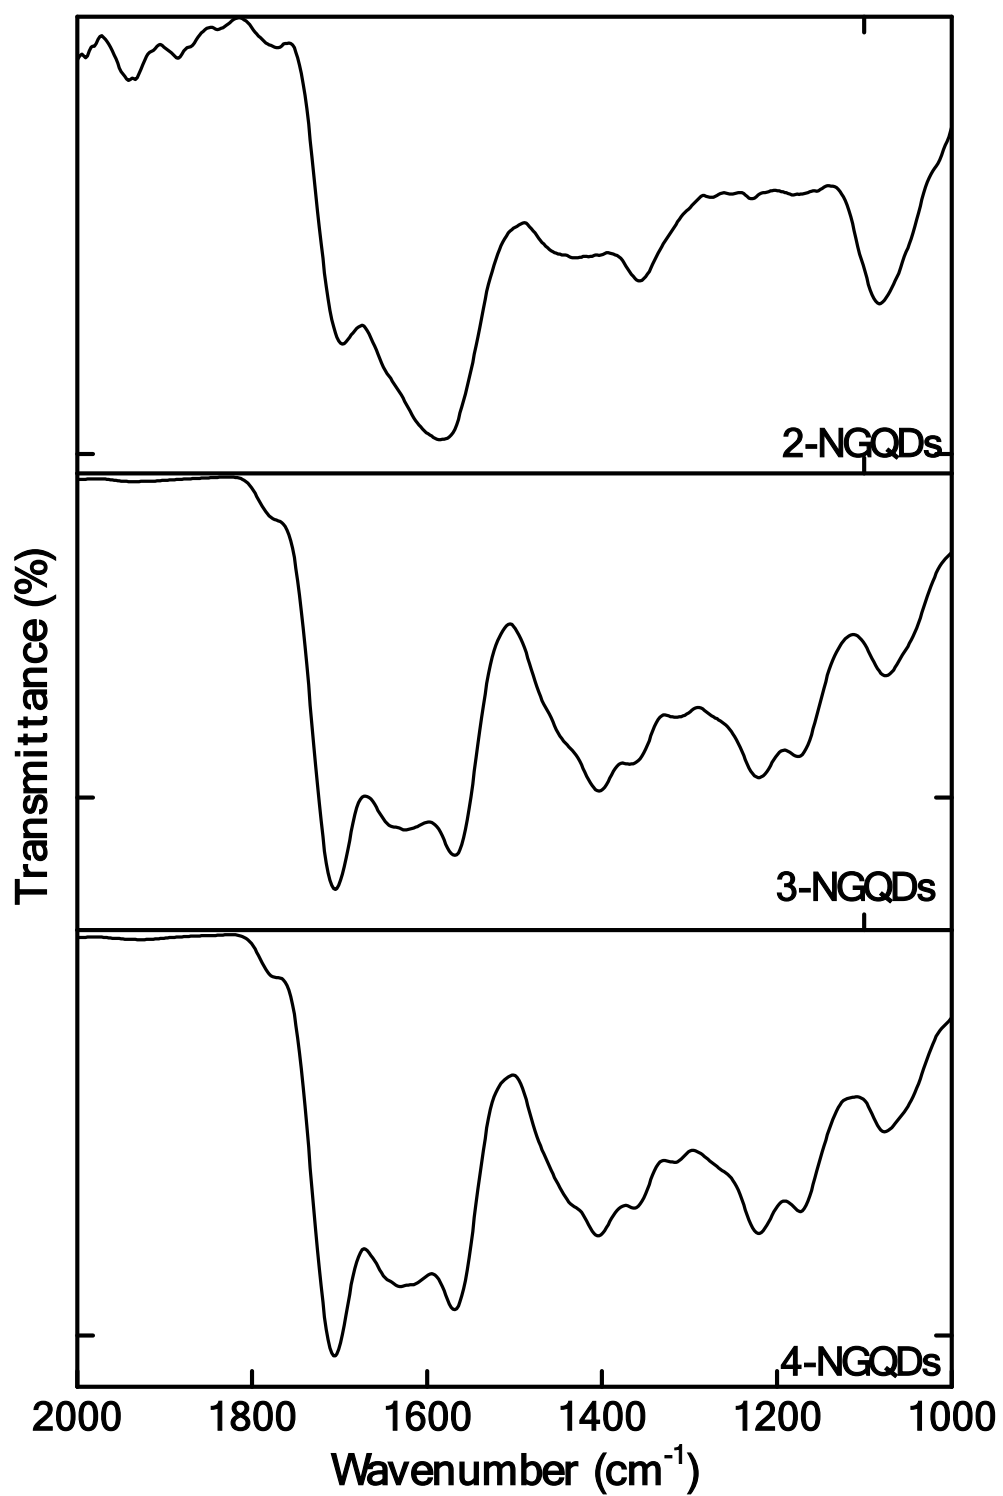

Figure S3. FT-IR spectra for the conjugates.

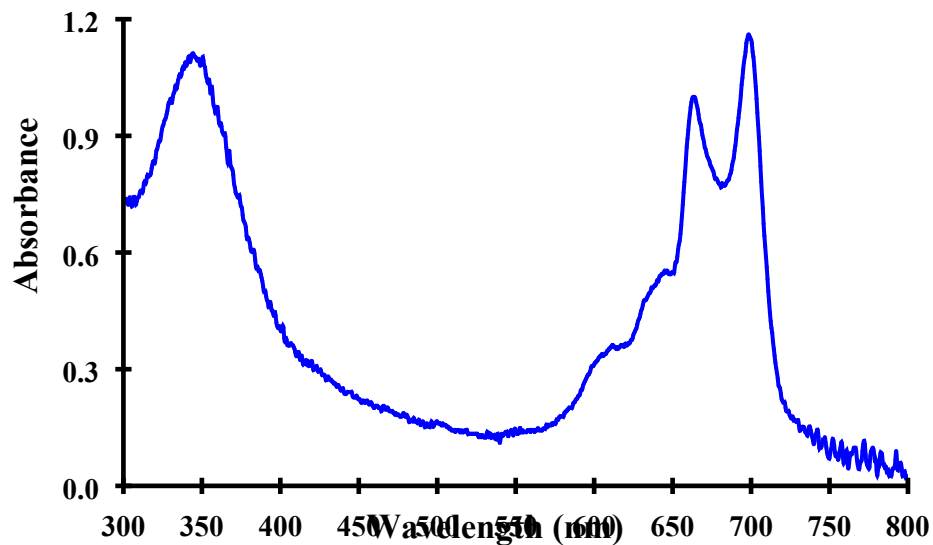

Figure S4. UV – Vis spectrum of NGQDs and complex 2 as an example

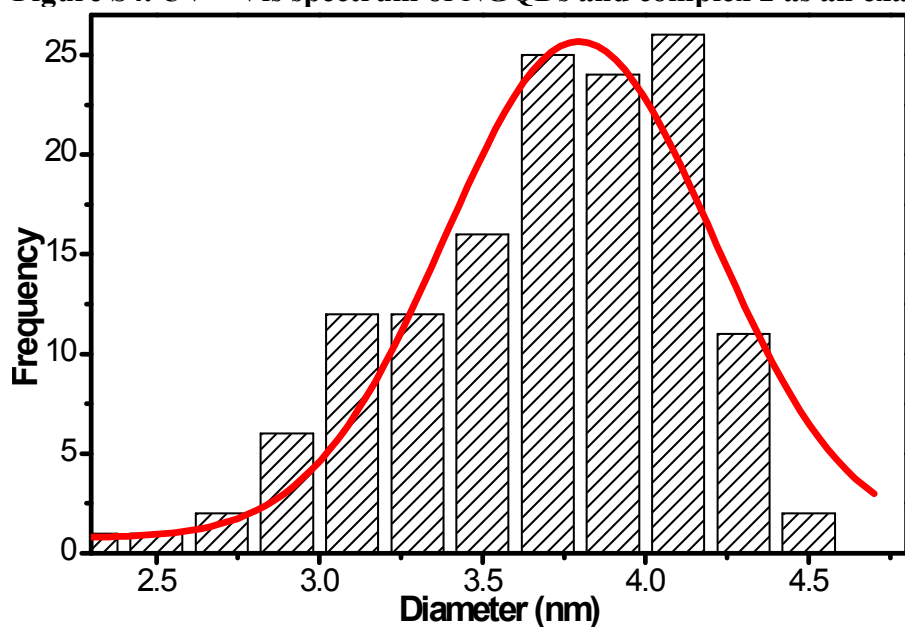

Figure S5. Histogram of the size distribution for NGQDs

Table S1: Optical limiting parameters for complexes and their conjugates

| Samples             | Wavelength (nm) | $\beta_{\text{eff}}$ (cm/GW) | Ref  |
|---------------------|-----------------|------------------------------|------|
| Zn Pcs              | 532             | 47.74                        | [36] |
| 40 diff. Pcs        | 532             | 0.073-85                     | [33] |
| LaPc                | 532             | 95.46                        | [37] |
| Eu(Pc) <sub>2</sub> | 532             | 85.2                         | [37] |

|                           |     |       |      |
|---------------------------|-----|-------|------|
| <b>Eu(Pc)<sub>2</sub></b> | 532 | 44.1  | [37] |
| <b>Nd(Pc)<sub>2</sub></b> | 532 | 42    | [38] |
| <b>Alkyl Pc1</b>          | 532 | 310   | [39] |
| <b>Alkyl Pc2</b>          | 532 | 420   | [39] |
| <b>Alkoxy Pc1</b>         | 532 | 1600  | [40] |
| <b>Alkoxy Pc1</b>         | 532 | 1800  | [40] |
| <b>GaPc dimer</b>         | 532 | 32-35 | [41] |
| <b>GO-PcZn</b>            | 532 | 51    | [7]  |
| <b>Pc-GQDs</b>            | 532 | 231   | [13] |
| <b>Pc-NGQDs</b>           | 532 | 287.6 | [13] |
| <b>Pc-SGQDs</b>           | 532 | 319.8 | [13] |
